# Supplementary material for: High-performing ultrafast transparent photodetector governed by the pyro–phototronic effect
Source: Royal Society of Chemistry journal article supplement (doi:10.1039/c7nr09699b), 2018-01-01
Supplement: c7nr09699b1.pdf [file c7nr09699b1.pdf]

## High-performing Ultrafast Transparent Photodetector Governed by Pyro-Phototronic Effect

Mohit Kumar<sup>a,b</sup>, Malkeshkumar Patel<sup>a,b</sup>, Thanh Tai Nguyen<sup>a,b</sup>,  
Joondong Kim<sup>a,b,\*</sup> and Junsin Yi<sup>c,\*\*</sup>

<sup>a</sup>*Department of Electrical Engineering, Incheon National University, 119 Academy Rd. Yeonsu, Incheon, 406772, Republic of Korea*

<sup>b</sup>*Photoelectric and Energy Device Application Lab (PEDAL), Multidisciplinary Core Institute for Future Energies (MCIFE), Incheon National University, 119 Academy Rd. Yeonsu, Incheon, 406772, Republic of Korea. \* E-mail of Joondong Kim [joonkim@incheon.ac.kr](mailto:joonkim@incheon.ac.kr)*

<sup>c</sup>*College of Information and Communication Engineering, Sungkyunkwan University, Suwon 16419, Republic of Korea. \*\*E-mail of Junsin Yi: [junsin@skku.edu](mailto:junsin@skku.edu)*

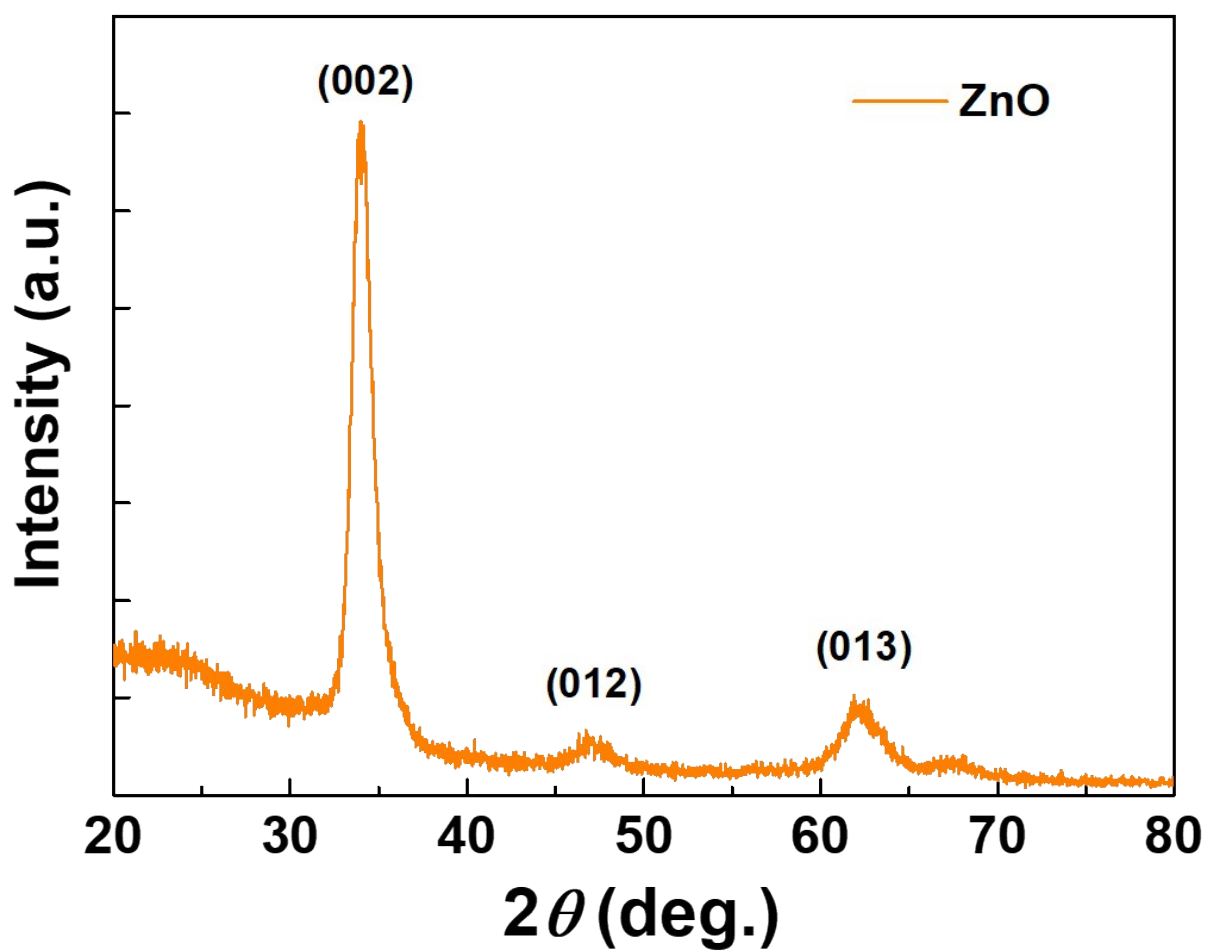

**Figure S1:** X-ray diffraction of the ZnO, showing preferential growth along the (002) plan.

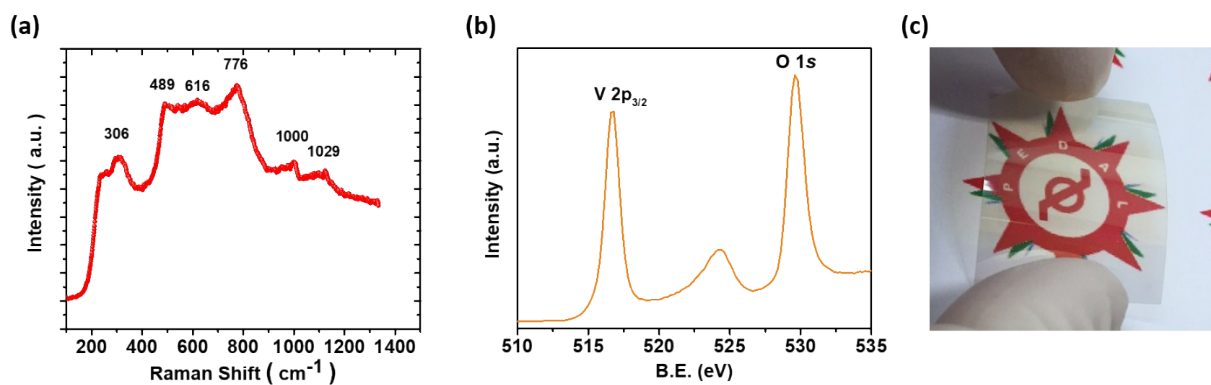

**Figure S2:** (a) Raman spectra (b) XPS of  $V_2O_5$ . (c) represent the device fabricated on flexible substrate.
